# Supplementary material
Source: PubMed Central journal article supplement (PMC6643750)
Supplement: ao6b00395_si_002.pdf [file ao6b00395_si_002.pdf]

# Electroformation of giant unilamellar vesicles on stainless steel electrodes

*Valerio Pereno<sup>†</sup>, Dario Carugo<sup>†,‡</sup>, Luca Bau<sup>†</sup>, Erdinc Sezgin<sup>§</sup>, Jorge Bernardino de la Serna<sup>¶</sup>,  
Christian Eggeling<sup>§</sup> and Eleanor Stride<sup>\*†</sup>*

<sup>†</sup>Institute of Biomedical Engineering, Department of Engineering Science, University of  
Oxford, Oxford, OX3 7DQ, United Kingdom

<sup>‡</sup>Mechatronics and Bioengineering Science research groups, Faculty of Engineering and the  
Environment, University of Southampton, SO17 1BJ, Southampton, United Kingdom

<sup>§</sup>Wetherall Institute of Molecular Medicine, Department of Immunology, University of  
Oxford, Oxford, OX3 9DS, United Kingdom

<sup>¶</sup>Science and Technology Facilities Council, Rutherford Appleton Laboratory, Central Laser  
Facility, Research Complex at Harwell, Harwell-Oxford, OX11 0FA, United Kingdom

## Supporting Information.

The cost of the Pt wires was calculated from the price of two 200 mm  $\varnothing$ 0.8mm electrodes from Goodfellow, UK obtained on 22 October 2014 (£292). The cost of the injection needles was calculated on 8\* 21G 50mm  $\varnothing$ 0.8mm needles from Becton, Dickinson and Company, UK. The price of ITO covered glass electrodes was calculated on an equivalent surface area of 8 needles, using the price of ITO square glass slides (~25 mm x 25 mm) from Sigma-Aldrich, UK.

The following table details the full cost breakdown of the custom-built electroformation chamber used in the experiments.

**Table S1.** Cost breakdown details on the items, materials and costs of the components of the electroformation chamber. Prices were obtained 14/12/2016.

| Item                                       | Manufacturer        | Price per item | Total price (£) |
|--------------------------------------------|---------------------|----------------|-----------------|
| Delrin block                               | theplasticshop      | 9.75           | 9.75            |
| Brass screws                               | RS Components       | 0.116          | 2.08            |
| Brass nut                                  | Westfield Fasteners | 0.0058         | 1.04            |
| Brass sheet                                | Macc Models         | 0.408          | 0.816           |
| Total cost of electroformation chamber (£) |                     |                | 13.69           |

## Limit of detection of oxidized DOPC

The limit of detection of oxidized lipids was estimated as the ratio of the concentration of an oxidized DOPC reference in  $\text{CDCl}_3$  corresponding to a peak height of the aldehyde proton (9.75 ppm) equal to three times the baseline noise, and the concentration of DOPC in a typical analytical sample (340  $\mu\text{M}$ ). The concentrations were calculated using benzoic acid (Sigma Aldrich, UK) as an internal standard.

The oxidized reference was synthesized by photooxidation of 1 mL of a 10 mg/mL solution of DOPC in oxygen saturated  $\text{CD}_3\text{OD}$  in the presence of  $[\text{Ru}(\text{bpy})_3]^{2+}$  immobilized on a

Dowex 50WX2 resin (50-100 mesh, 0.6 meq/mL, 4% [Ru(bpy)<sub>3</sub>]<sup>2+</sup> loading) prepared according to a literature procedure.<sup>1</sup> A glass vial containing the resin and the DOPC solution was sealed and left to rotate on a rotator while illuminated with a fluorescent lamp (49315 FML27/65 GX10q-4, Eiko) from a distance of 10 cm. After 48 hours the solution was filtered and the resin was rinsed with methanol and chloroform. The solvent was removed with a nitrogen stream to afford a colorless oil that was dried under vacuum, redissolved in CDCl<sub>3</sub> and used without further purification. The <sup>1</sup>H-NMR spectrum shows the presence of secondary oxidation products (including the aldehyde used to estimate the limit of detection), presumably from the decomposition of hydroperoxides, and hydrolysis products.

### Unilamellarity experiments data

**Table S2.** Fluorescence measurements and calculations for fluorescence quenching assay.

| Experiment | Pre-quenching | Quenched | Lysed | Unilamellarity |
|------------|---------------|----------|-------|----------------|
| 1          | 72.6          | 50.5     | 24.0  | 0.545          |
| 2          | 96.0          | 60.0     | 24.4  | 0.497          |
| 3          | 112           | 67.3     | 24.0  | 0.495          |

### Photograph of GUV electroformation chamber

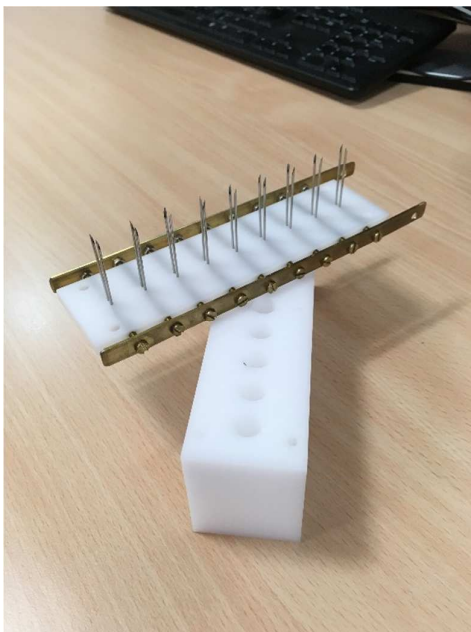

**Figure S1.** Photograph of a GUV electroformation chamber containing nine pairs of needles and nine chambers.

### References

- (1) Buell, S. L.; Demas, J. N. Heterogeneous Preparation of Singlet Oxygen Using an Ion-Exchange-Resin-Bound tris(2,2'-bipyridine)ruthenium(II) Photosensitizer. *J. Phys. Chem.* **1983**, *87*, 4675–4681.
